# Supplementary material for: Biofunctional Hyaluronic Acid/κ-Carrageenan Injectable Hydrogels for Improved Drug Delivery and Wound Healing
Source: MDPI journal article supplement (doi:10.3390/polym14030376), 2022-01-18
Supplement: s1 [file s1]

**Table S1.** Rheological study results for thermosensitive injectable hydrogel at 25 °C.

| S. No | Temp (°C) | Time (sec) | Shear rate D(s-1) | Shear stress ( Pa) | Viscosity (Pa.s) |
|-------|-----------|------------|-------------------|--------------------|------------------|
| 1     | 25        | 11.4       | 10                | 0.188              | 0.019            |
| 2     | 25        | 21.4       | 20                | 0.0128             | 0.0064           |
| 3     | 25        | 31.4       | 30                | 0.144              | 0.0048           |
| 4     | 25        | 41.4       | 40                | 0.014              | 0.0035           |
| 5     | 25        | 51.4       | 50                | 0.045              | 0.0026           |
| 6     | 25        | 61.4       | 60                | 0.05               | 0.002            |
| 7     | 25        | 71.4       | 80                | 0.161              | 0.0019           |
| 8     | 25        | 81         | 100               | 0.111              | 0.0017           |
| 9     | 25        | 91.4       | 120               | 0.13               | 0.0015           |
| 10    | 25        | 101.4      | 140               | 0.211              | 0.0014           |
| 11    | 25        | 111.4      | 180               | 0.186              | 0.0013           |
| 12    | 25        | 121.4      | 220               | 0.256              | 0.0011           |
| 13    | 25        | 131.4      | 260               | 0.341              | 0.0013           |
| 14    | 25        | 141.4      | 300               | 0.44               | 0.001            |
| 15    | 25        | 151        | 340               | 0.551              | 0.0008           |

**Table S2.** Rheological study results for thermosensitive injectable hydrogel at 34 °C.

| S. No | Temp °C | Time (sec) | Shear rate D(s-1) | Shear stress(Tau( Pa) | Viscosity (Pa.s) |
|-------|---------|------------|-------------------|-----------------------|------------------|
| 1     | 25      | 11.4       | 10                | 4.64                  | 0.464            |
| 2     | 25      | 21.4       | 20                | 4.42                  | 0.221            |
| 3     | 25      | 31.4       | 30                | 4.73                  | 0.158            |
| 4     | 25      | 41.4       | 40                | 4.51                  | 0.113            |
| 5     | 25      | 51.4       | 50                | 4.11                  | 0.08             |
| 6     | 25      | 61.4       | 60                | 3.53                  | 0.059            |
| 7     | 25      | 71.4       | 80                | 2.66                  | 0.033            |
| 8     | 25      | 81         | 100               | 2.4                   | 0.024            |
| 9     | 25      | 91.4       | 120               | 2.51                  | 0.021            |
| 10    | 25      | 101.4      | 140               | 2.46                  | 0.018            |
| 11    | 25      | 111.4      | 180               | 2.53                  | 0.014            |
| 12    | 25      | 121.4      | 220               | 2.86                  | 0.013            |
| 13    | 25      | 131.4      | 260               | 3.32                  | 0.013            |
| 14    | 25      | 141.4      | 300               | 3.78                  | 0.013            |
| 15    | 25      | 151        | 340               | 4.5                   | 0.013            |

**Table S3.** Release kinetic models of injectable hydrogel with changing HA, kappa carrageenan and F127 concentration.

| Sample Codes | Simulated body fluids | Zero Order kinetics | First Orders kinetics | Higuchi Model  | Korsmeyer peppas |
|--------------|-----------------------|---------------------|-----------------------|----------------|------------------|
|              |                       | R <sup>2</sup>      | R <sup>2</sup>        | R <sup>2</sup> | n                |
| HC-1         | SWF                   | 0.8871              | 0.9865                | 0.9792         | 0.975            |
|              | PBS                   | 0.8242              | 0.9663                | 0.9482         | 0.9423           |
| HC-2         | SWF                   | 0.9067              | 0.9949                | 0.9844         | 0.9756           |
|              | PBS                   | 0.8563              | 0.9823                | 0.9637         | 0.9677           |
| HC-3         | SWF                   | 0.882               | 0.9909                | 0.9758         | 0.9629           |
|              | PBS                   | 0.8328              | 0.9927                | 0.954          | 0.9569           |
| HC-4         | SWF                   | 0.8955              | 0.9869                | 0.9828         | 0.9856           |
|              | PBS                   | 0.8671              | 0.9761                | 0.977          | 0.9875           |
| HC-5         | SWF                   | 0.8602              | 0.9616                | 0.9628         | 0.9829           |
|              | PBS                   | 0.8299              | 0.959                 | 0.9529         | 0.9786           |
| HC-6         | SWF                   | 0.8982              | 0.9898                | 0.9795         | 0.97719          |
|              | PBS                   | 0.8887              | 0.9906                | 0.9767         | 0.981            |
| HC-7         | SWF                   | 0.9299              | 0.9886                | 0.9811         | 0.9673           |
|              | PBS                   | 0.8869              | 0.977                 | 0.9668         | 0.9627           |
| HC-8         | SWF                   | 0.8275              | 0.9716                | 0.955          | 0.9821           |
|              | PBS                   | 0.7202              | 0.9168                | 0.8845         | 0.9349           |
| HC-9         | SWF                   | 0.7868              | 0.913                 | 0.9322         | 0.9744           |
|              | PBS                   | 0.7433              | 0.8766                | 0.9047         | 0.9712           |
